# Supplementary material for: Evolution of metazoan oxygen-sensing involved a conserved divergence of VHL affinity for HIF1α and HIF2α
Source: PubMed Central journal article supplement (PMC6650433; doi:10.1038/s41467-019-11149-1), 2019-07-23
Supplement: 41467_2019_11149_MOESM1_ESM.pdf [file 41467_2019_11149_MOESM1_ESM.pdf]

**Evolution of metazoan oxygen-sensing involved a conserved divergence of VHL affinity for HIF1 $\alpha$  and HIF2 $\alpha$**

Tarade et al.

**Supplementary Information**

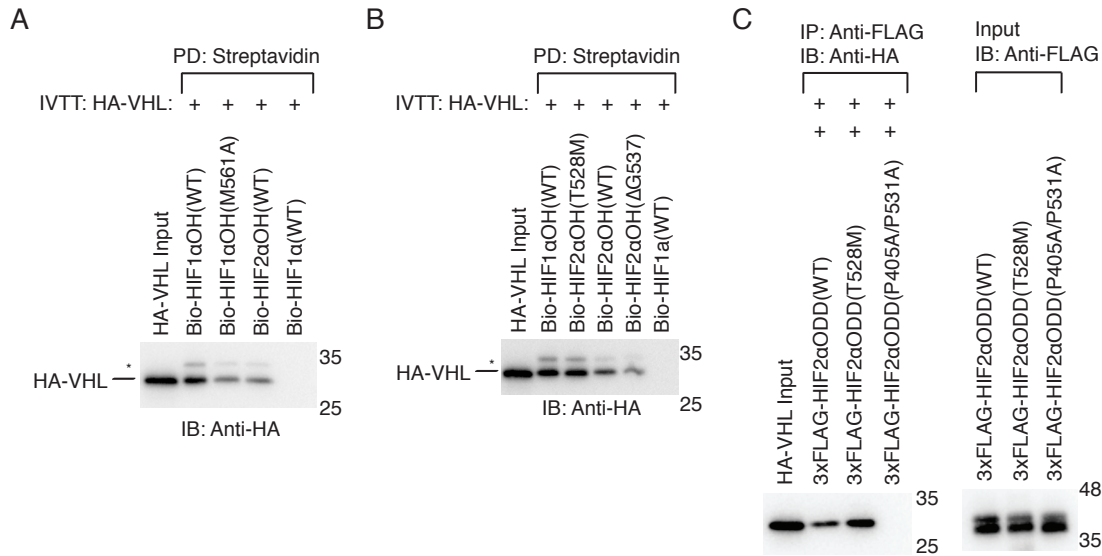

**Supplementary Figure 1. Substitution of Met<sub>n-3</sub> with alanine or threonine results in decreased affinity for pVHL. a, b** Biotinylated HIFαOH peptides were immobilized on streptavidin- agarose beads and incubated with *in vitro* transcribed and translated (IVTT) pVHL. Streptavidin beads were pulled down (PD) and levels of HA-tagged pVHL were visualized via immunoblotting (IB). **c** 3xFLAG-HIF2α oxygen dependent degradation (ODD) domains were IVTT and incubated with purified HIS<sub>6</sub>-PHD2 (181-426). Following hydroxylation (one hour), 3xFLAG-HIF2α ODD domain was immobilized on protein A beads coated with anti-FLAG antibody and incubated with IVTT HA-VHL. 3xFLAG-HIF2α ODD domain was immunoprecipitated (IP) and levels of HA-tagged VHL were visualized via immunoblotting (IB). Molecular weight markers (kDa) are labeled.

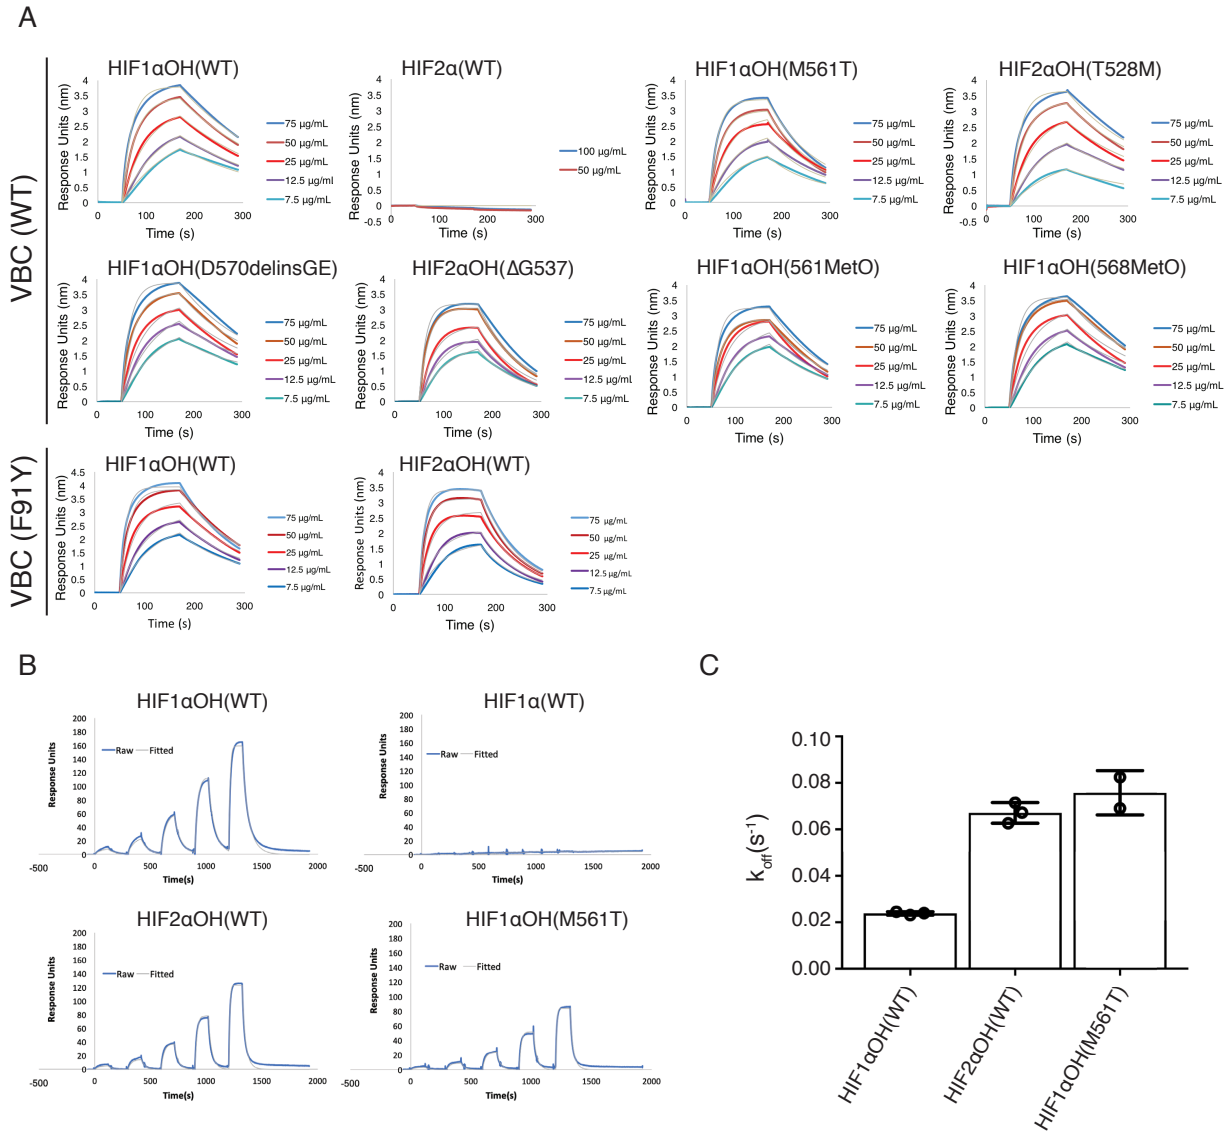

**Supplementary Figure 2. Kinetic analysis of VHL complex binding to HIF $\alpha$  peptides.** **a** Bi-layer interferometry kinetic analysis of pVHL-elongin B-elongin C (VBC), either WT or F91Y (where indicated), complex binding to biotinylated HIF $\alpha$ OH peptides. Biotinylated peptides were coupled to streptavidin-coated biosensors and monitored for binding to VBC complex at the indicated concentrations. The data were analyzed based on a 1:1 binding model using the BLItz Pro software with the fitted curves shown as gray lines. Sensorgrams are representative of three experiments conducted with independently purified proteins. **b, c** Surface plasmon resonance analysis of VBC(WT) complex binding to biotinylated HIF $\alpha$ OH peptides. Biotinylated peptides were coupled to a streptavidin-coated SPR chip. Single-cycle kinetics were carried out with increasing concentrations of VBC (0.123  $\mu$ g/mL, 0.37  $\mu$ g/mL, 1.11  $\mu$ g/mL, 3.33  $\mu$ g/mL, 10  $\mu$ g/mL) with a contact time of 120 seconds and a final dissociation step of 600 seconds. A flow rate of 30  $\mu$ L/min was maintained throughout the experiment. The data were analyzed based on a 1:1 binding model using the Biacore X100 evaluation software with the fitted curves shown as gray lines. **b** Representative sensorgrams. **c** The dissociation constants associated with VBC binding to HIF $\alpha$  peptides are shown on a linear scale. Values represent mean  $\pm$  s.d. Two technical replicates were performed for each peptide with an additional replication performed with independently purified protein for HIF1 $\alpha$ OH(WT) and HIF2 $\alpha$ OH(WT).

| HIF1α               | 564          | VHL                 | 88             | HIF2α               | 531         |
|---------------------|--------------|---------------------|----------------|---------------------|-------------|
| H. sapiens          | DLDLEMLAPY   | H. sapiens          | VLPVWLNFDGE    | H. sapiens          | DLETLAPYIP  |
| M. fascicularis     | DLDLEMLAPY   | I. tridecemlineatus | VLPVWLNFDGE    | M. fascicularis     | DLETLAPYIP  |
| I. tridecemlineatus | DLDLEMLAPY   | M. musculus         | VLPVWLNFDGE    | I. tridecemlineatus | DLETLAPYIP  |
| M. musculus         | DLDLEMLAPY   | M. unguiculatus     | VLPVWLNFDGE    | M. musculus         | DLETLAPYIP  |
| M. unguiculatus     | DLDLEMLAPY   | C. hircus           | VLPVWLNFDGE    | M. unguiculatus     | DLETLAPYIP  |
| C. hircus           | DLDLEMLAPY   | D. leucas           | VLPVWLNFDGE    | C. hircus           | DLETLAPYIP  |
| D. leucas           | DLDLEMLAPY   | O. hannah           | VSPVWLNFDGK    | D. leucas           | DLETLAPYIP  |
| P. erythrurus       | DLDLEMLAPY   | P. vitticeps        | VSPVWLNFDGK    | P. erythrurus       | DLETLAPYIP  |
| P. przewalskii      | DLDLEMLAPY   | G. gallus           | VLPVWLNFDGE    | P. vitticeps        | DLETLAPYIP  |
| P. vitticeps        | DLDLEMLAPY   | C. caeruleus        | VLPVWLNFDGE    | G. gallus           | DLETLAPYIP  |
| O. hannah           | DLDLEMLAPY   | X. laevis           | VQPVWLNFDGQ    | A. Platyrrhynchos   | DLETLAPYIP  |
| G. gallus           | DLDLEMLAPY   | L. chalumnae        | VQPVWLNFDGQ    | C. livia            | DLETLAPYIP  |
| A. platyrrhynchos   | DLDLEMLAPY   | D. rerio            | VKPVWLNFDGE    | C. caeruleus        | DLETLAPYIP  |
| C. livia            | DLDLEMLAPY   | C. carpio           | AEAWWLNFDAGK   | L. lapponica        | DLETLAPYIP  |
| C. caeruleus        | DLDLEMLAPY   | O. tshawytscha      | ARAWWLNFDGSH   | X. laevis           | DLETLAPYIP  |
| L. lapponica_baueri | DLDLEMLAPY   | R. typus            | ARPWVWLNFDGV   | X. tropicalis       | DLETLAPYIP  |
| X. laevis           | DLDLEMLAPY   | C. milii            | VRPWVWLNFDGFF  | L. chalumnae        | DLETLAPYIP  |
| R. temporaria       | DLDLEMLAPY   | P. marinus          | ARPLWLNFDGQV   | H. ocellatum        | DLETLAPYIP  |
| L. chalumnae        | DLDLEMLAPY   | S. kowalevskii      | VDVWLNFDGQV    | R. typus            | DLETLAPYIP  |
| F. annectens        | GLDLEMLAPY   | S. purpuratus       | VDVWLNFDGQV    | C. milii            | DLETLAPYIP  |
| H. ocellatum        | NLDLEMLAPY   | A. planci           | VDIWLWLNFDGGE  | D. rerio            | DLETLAPYIP  |
| R. typus            | NLDLEMLAPY   | C. gigas            | ATLFWLNFDKGE   | O. tshawytscha      | DLETLAPYIP  |
| M. canis            | DLDLEMLAPY   | C. virginica        | ATLFWLNFDKGD   | C. carpio           | DLETLAPYIP  |
| C. milii            | GLDLEMLAPY   | M. yessoensis       | VDTVWLNFDGEA   | P. marinus          | DLETLAPYIP  |
| A. gueldenstaedtii  | DFDLEMLAPY   | L. anatina          | VDVWLNFDGEA    | F. marinus          | DLETLAPYIP  |
| D. rerio            | DLDLEMLAPY   | I. scapularis       | VDVWLNFDYNGT   | S. kowalevskii      | DLETLAPYIP  |
| O. tshawytscha      | DLDLEMLAPY   | D. magna            | VEVWLNFDYNGA   | S. purpuratus       | DLETLAPYIP  |
| C. carpio           | DLDLEMLAPY   | O. pulex            | VEVWLNFDYNGA   | A. planci           | DLETLAPYIP  |
| P. marinus          | DMLEMLAPY    | O. abietinus        | VGVWLNFDYQGH   | C. gigas            | DLDMDMRAPY  |
| S. kowalevskii      | TEELVMRAPY   | N. vitripennis      | TSVWLNFDYQSK   | C. virginica        | DLDMDMRAPY  |
| S. purpuratus       | CDELAMRAPY   | T. cornetzi         | ITLYWLNFDYQCG  | M. yessoensis       | EIDMDTRAPY  |
| A. planci           | . . DLSMRAPY | B. terrestris       | VVLYWLNFDYQGR  | L. anatina          | EMEMYMRAPY  |
| C. gigas            | DLDMDMRAPY   | C. elegans          | VDVWLNFDYQSKQ  | H. diversicolor     | DVDLNMRRAPY |
| C. virginica        | DLDMDMRAPY   | O. faveolata        | VKVLWLNFDYQGE  | L. polyphemus       | DEELFERAPY  |
| M. yessoensis       | EIDMDTRAPY   | S. pistillata       | VNLRWLNFDYSGE  | D. magna            | EELDRRAPY   |
| L. anatina          | EMEMYMRAPY   | A. digitifera       | VDVWLNFDYQGG   | D. pulex            | EELDRRAPY   |
| H. diversicolor     | DVDLNMRRAPY  | E. pallida          | VNLTWLNFDYNGR  | N. lugens           | ADDFAVTAPY  |
| L. polyphemus       | DEELFERAPY   | T. adhaerens        | AKMTLWLNFDYNGE | O. taurus           | DPDLVMKAPY  |
| D. magna            | EELDRRAPY    |                     |                | O. abietinus        | DDELALRAPY  |
| D. pulex            | EELDRRAPY    |                     |                | T. cornetzi         | DEELALRAPY  |
| N. lugens           | ADDFAVTAPY   |                     |                | C. elegans          | EPDLSCLAPF  |
| O. taurus           | DPDLVMKAPY   |                     |                | A. suum             | NFDLQTLAPF  |
| O. abietinus        | DDELALRAPY   |                     |                | P. pacificus        | DDSFDMNAPF  |
| T. cornetzi         | DEELALRAPY   |                     |                | E. pallida          | DLDMDRDRAPF |
| C. elegans          | EPDLSCLAPF   |                     |                | N. vectensis        | SNELNRRAPY  |
| A. suum             | NFDLQTLAPF   |                     |                | O. faveolata        | EENFDERAPF  |
| P. pacificus        | DDSFDMNAPF   |                     |                | S. pistillata       | EENFDERAPF  |
| E. pallida          | DLDMDRDRAPF  |                     |                | T. adhaerens        | KEEYDRLAPF  |
| N. vectensis        | SNELNRRAPY   |                     |                |                     |             |
| O. faveolata        | EENFDERAPF   |                     |                |                     |             |
| S. pistillata       | EENFDERAPF   |                     |                |                     |             |
| T. adhaerens        | KEEYDRLAPF   |                     |                |                     |             |

**Supplementary Figure 3. Alignment of amino acid sequences.** Annotated HIF1α, VHL, and HIF2α sequences were identified through use of BLASTP. Sequences were aligned using the MAFFT algorithm via the GUIDANCE webserver. Numbering of residues is based on the *H. sapiens* protein. Columns where >70% of residues are equivalent are colored in red and boxed in blue. Invariant residues are colored white on a red background. ESPrpt3 was used to display alignments.

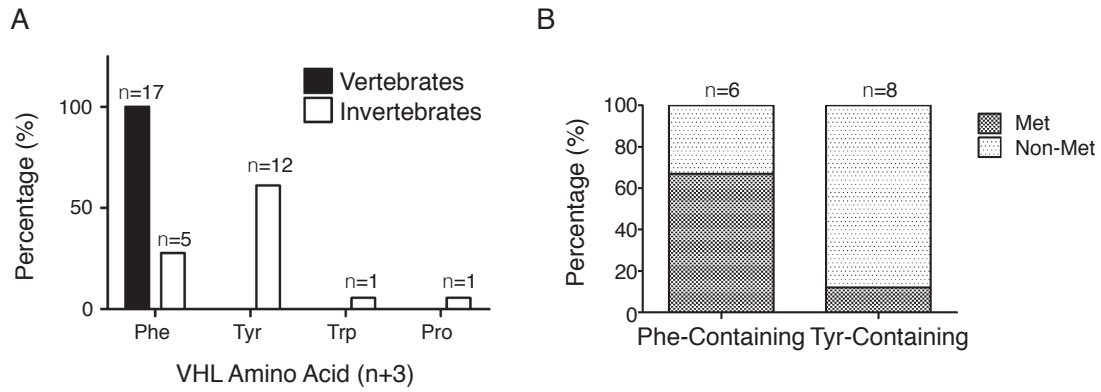

**Supplementary Figure 4. VHL Phe<sub>n+3</sub> is conserved in vertebrate species.** **a** Annotated VHL sequences were identified through use of BLASTP. Sequences were aligned using the MAFFT algorithm via the GUIDANCE webserver. The frequency of the amino acid three residues C-terminal of an invariant tryptophan (VHL Trp88 in humans) is indicated for vertebrate and invertebrate species. **b** Based on VHL and HIF $\alpha$  sequence alignments, the frequency of VHL Phe<sub>n+3</sub> and HIF $\alpha$  Met<sub>n-3</sub> are indicated. As VHL Phe<sub>n+3</sub> and HIF1 $\alpha$  Met<sub>n-3</sub> are invariant in vertebrate species, the analysis is only conducted in invertebrate species for which an annotated VHL and HIF $\alpha$  sequences are available.

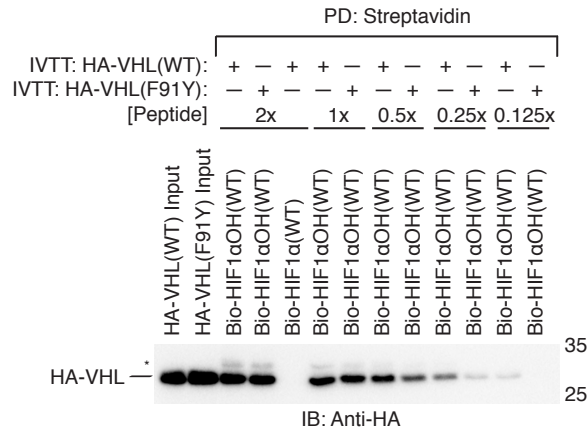

**Supplementary Figure 5. Increased peptide concentration obscures differential binding of WT and F91Y VHL to HIF1αOH.** 1x peptide concentration = 1.2 μg. Biotinylated HIFαOH peptides were immobilized on streptavidin-agarose beads and incubated with in vitro transcribed and translated (IVTT) pVHL. Streptavidin beads were pulled down (PD) and levels of HA-tagged pVHL were visualized via immunoblotting (IB). Molecular weight markers (kDa) are labeled.

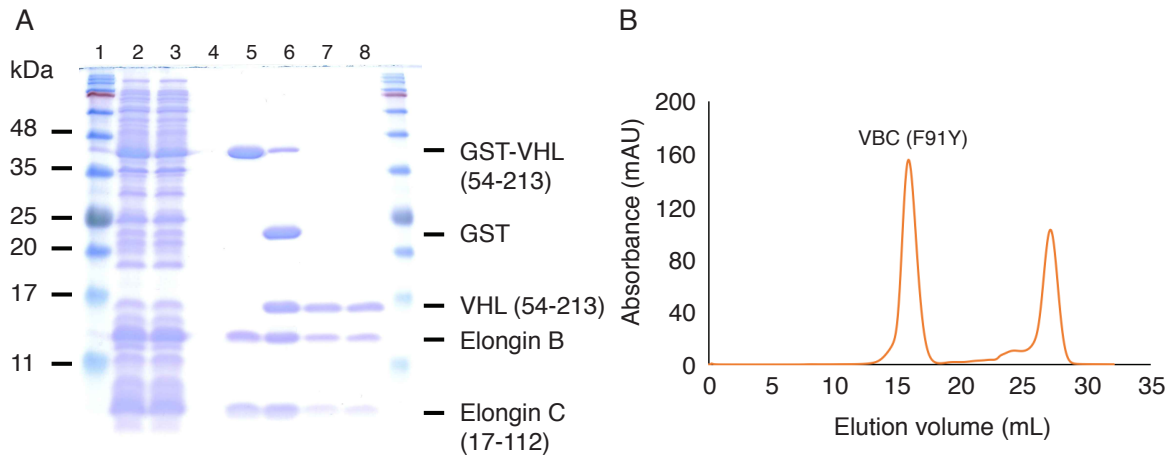

**Supplementary Figure 6. Purification of pVHL(F91Y)-elongin B-elongin C (VBC) complex.** Transformed BL21(DE3) *E. coli* were induced to express GST-tagged pVHL<sub>19</sub> (residues 54-213) along with untagged elongin B and elongin C (17-112). (A) GST-VBC complex was affinity purified using glutathione sepharose resin. Thrombin was used to cleave the GST-tag from pVHL. Affinity purification was used to remove GST from the protein solution. SDS-PAGE analysis followed by Coomassie staining was employed to monitor successful cleavage of the GST-tag and purity of the sample. Lane 1 = protein ladder; lane 2 = input; lane 3 = flow-through; lane 4 = wash; lane 5 = elution; lane 6 = cleavage; lane 7 = affinity purification; lane 8 = 2 µg purified VBC following size exclusion chromatography (SEC). (B) VBC (F91Y) complex was purified to homogeneity using SEC. The VBC (F91Y) complex had an elution volume of approximately 16 mL. mAU = milli absorption units.

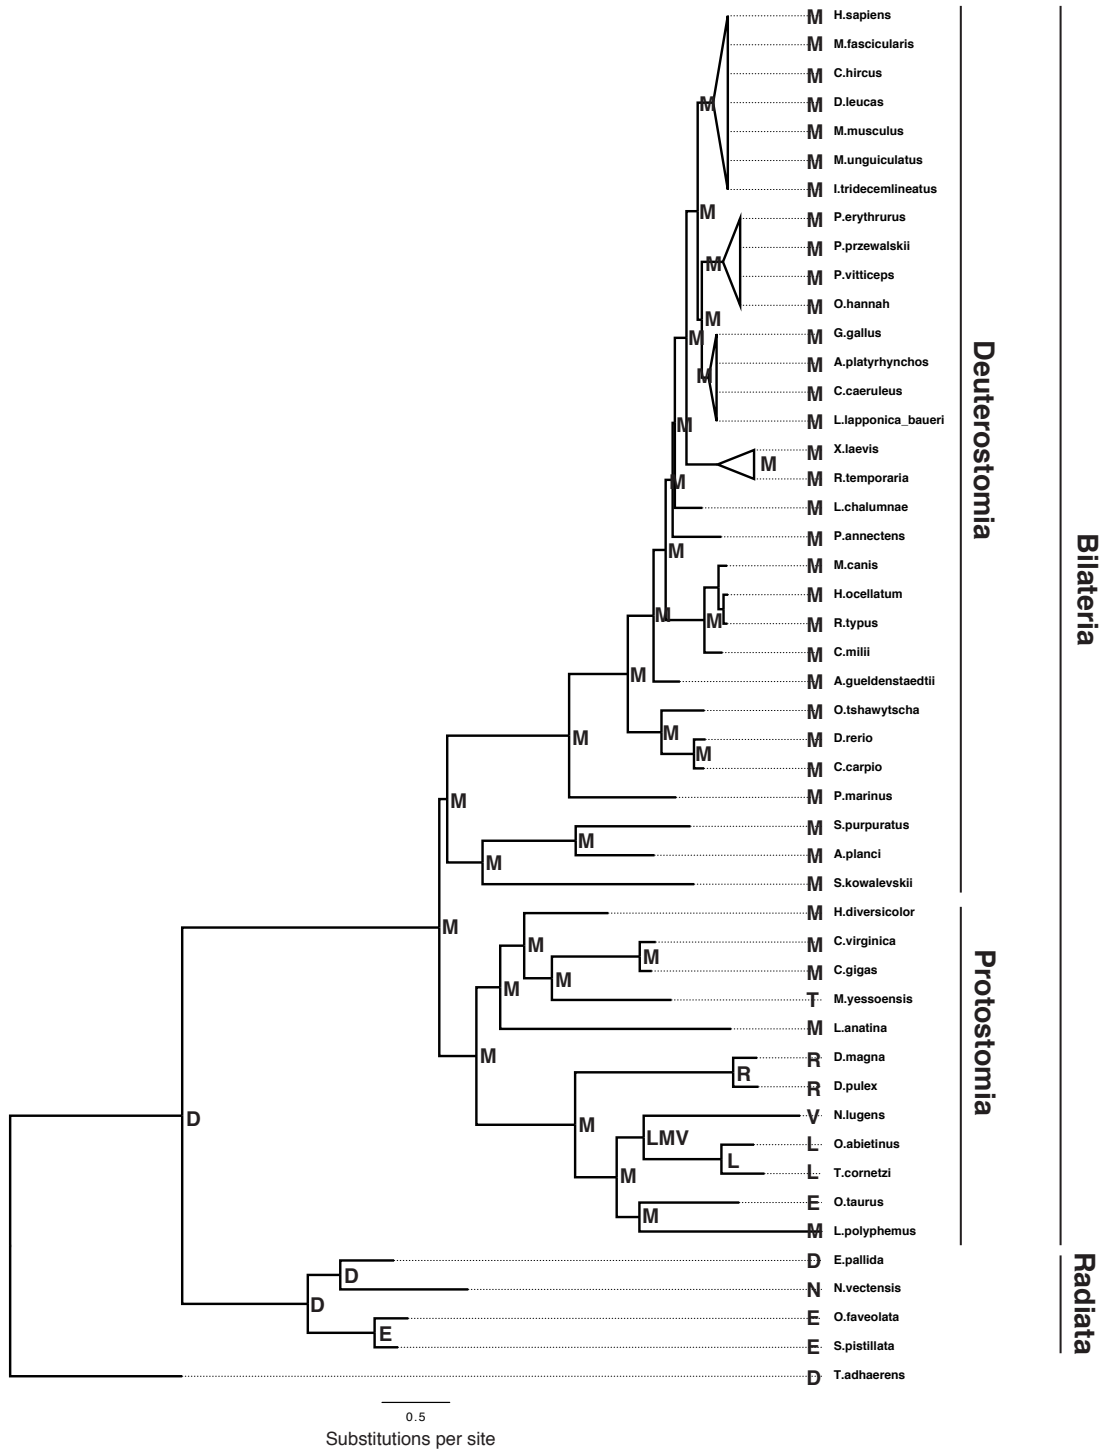

**Supplementary Figure 7. Inference of ancestral HIF1 $\alpha$  sequence.** Using a maximum parsimony method, the amino acid identity of HIF X<sub>n-3</sub> was inferred at nodes during invertebrate evolution. The maximum likelihood phylogenetic tree (see Fig. 3a) was used as a guide. The set of states at each node is ordered from most likely to least likely, excluding states with probabilities below 5%.



**Supplementary Table 1. List of Primers. Related to Experimental Procedures.**

| <b>Primer Name</b>          | <b>Primer Sequence (5'-3')</b>                       |
|-----------------------------|------------------------------------------------------|
| HIF1 $\alpha$ (387-581) FWD | ATTATTGAATTCTCAGGAACTGCTTTCTAATGGTGACAACTGATCGAAGG   |
| HIF1 $\alpha$ (387-581) REV | ATTATTGCGGCCGCTCAGGAACTGCTTTCTAATGGTGACAACTGATCGAAGG |
| HIF2 $\alpha$ P405A FWD     | TGGGGTGGCAGCCAGCTGGGCCA                              |
| HIF2 $\alpha$ P405A REV     | TGGCCCAGCTGGCTGCCACCCCA                              |
| HIF2 $\alpha$ T528M FWD     | GGGATATAGGGTGCCAGCATCTCCAAGTCCAGCTCA                 |
| HIF2 $\alpha$ T528M REV     | TGAGCTGGACTTGGAGATGCTGGCACCCCTATATCCC                |
| HIF1 $\alpha$ M561T FWD     | GGGATATAGGGAGCTAACGTCTCCAAGTCTAAATCTG                |
| HIF1 $\alpha$ M561T REV     | CAGATTTAGACTTGGAGACGTTAGCTCCCTATATCCC                |
| VHL F91Y FWD                | TCGCCGTCGTAGTTGAGCCATACGGGC                          |
| VHL F91Y REV                | GCCCGTATGGCTCAACTACGACGGCGA                          |
| VHL F91W FWD                | GGCTCGCCGTCCCAGTTGAGCCATACGGG                        |
| VHL F91W REV                | CCCGTATGGCTCAACTGGGACGGCGAGCC                        |
| VHL F91L FWD                | GCTCGCCGTCTAAGTTGAGCCATACGGGC                        |
| VHL F91L REV                | GCCCGTATGGCTCAACTTAGACGGCGAGC                        |

**Supplementary Table 2. Sequence ID for HIF1 $\alpha$ , HIF2 $\alpha$ , and VHL. Related to Experimental Procedures.**

| Species Name                      | Common Name            | HIF1 Sequence ID          | Gene ID        | Protein ID     |
|-----------------------------------|------------------------|---------------------------|----------------|----------------|
| <i>Homo sapiens</i>               | Human                  | HIF1 $\alpha$ Sequence ID | NM_001530.3    | NP_001521.1    |
|                                   |                        | HIF2 $\alpha$ Sequence ID | U81984.1       | AAB41495       |
|                                   |                        | VHL Sequence ID           | NM_000551.3    | NP_000542.1    |
| <i>Macaca fascicularis</i>        | Crab-eating macaque    | HIF1 $\alpha$ Sequence ID | NM_001283896.1 | NP_001270825.1 |
|                                   |                        | HIF2 $\alpha$ Sequence ID | XM_005575965.2 | XP_005576022.1 |
|                                   |                        | VHL Sequence ID           |                |                |
| <i>Delphinapterus leucas</i>      | Beluga whale           | HIF1 $\alpha$ Sequence ID | KJ619999.1     | AIB53793.1     |
|                                   |                        | HIF2 $\alpha$ Sequence ID | KX227381.1     | APX43029.1     |
|                                   |                        | VHL Sequence ID           | XM_022564705.1 | XP_022420413.1 |
| <i>Capra hircus</i>               | Goat                   | HIF1 $\alpha$ Sequence ID | KC700026.1     | AGM38929.1     |
|                                   |                        | HIF2 $\alpha$ Sequence ID | XM_018055188.1 | XP_017910677.1 |
|                                   |                        | VHL Sequence ID           | XM_018038280.1 | XP_017893769.1 |
| <i>Mus musculus</i>               | Mouse                  | HIF1 $\alpha$ Sequence ID | AF003695.1     | AAC53455.1     |
|                                   |                        | HIF2 $\alpha$ Sequence ID | BC057870.1     | AAH57870.1     |
|                                   |                        | VHL Sequence ID           | NM_009507.4    | NP_033533.1    |
| <i>Ictidomys tridecemlineatus</i> | Squirrel               | HIF1 $\alpha$ Sequence ID | XM_013357468.2 | XP_013212922.1 |
|                                   |                        | HIF2 $\alpha$ Sequence ID | XM_005324504.3 | XP_005324561.1 |
|                                   |                        | VHL Sequence ID           | XM_005343104.3 | XP_005343161.2 |
| <i>Meriones unguiculatus</i>      | Gerbil                 | HIF1 $\alpha$ Sequence ID | XM_021651031.1 | XP_021506706.1 |
|                                   |                        | HIF2 $\alpha$ Sequence ID | XM_021643571.1 | XP_021499246.1 |
|                                   |                        | VHL Sequence ID           | XM_021637655.1 | XP_021493330.1 |
| <i>Gallus gallus</i>              | Chicken                | HIF1 $\alpha$ Sequence ID | NM_204297.1    | NP_989628.1    |
|                                   |                        | HIF2 $\alpha$ Sequence ID | NM_204807.2    | NP_990138.1    |
|                                   |                        | VHL Sequence ID           | XM_414447.5    | XP_414447.3    |
| <i>Anas platyrhynchos</i>         | Mallard                | HIF1 $\alpha$ Sequence ID | XM_005029943.3 | XP_005030000.2 |
|                                   |                        | HIF2 $\alpha$ Sequence ID | XM_005009804.3 | XP_005009861.2 |
|                                   |                        | VHL Sequence ID           |                |                |
| <i>Limosa lapponica baueri</i>    | Bar-tailed godwit      | HIF1 $\alpha$ Sequence ID | KZ506160.1     | PKU41137.1     |
|                                   |                        | HIF2 $\alpha$ Sequence ID | KZ505646.1     | PKU48810.1     |
|                                   |                        | VHL Sequence ID           |                |                |
| <i>Cyanistes caeruleus</i>        | Blue tit               | HIF1 $\alpha$ Sequence ID | XM_023927146.1 | XP_023782914.1 |
|                                   |                        | HIF2 $\alpha$ Sequence ID | XM_023924504.1 | XP_023780272.1 |
|                                   |                        | VHL Sequence ID           | XM_023935659.1 | XP_023791427.1 |
| <i>Columba livia</i>              | Rock pigeon            | HIF1 $\alpha$ Sequence ID | AKCR02000005.1 | PKK31254.1     |
|                                   |                        | HIF2 $\alpha$ Sequence ID | AKCR02000024.1 | PKK26737       |
|                                   |                        | VHL Sequence ID           |                |                |
| <i>Phrynocephalus przewalskii</i> | Toadhead Agama         | HIF1 $\alpha$ Sequence ID | KP696482.1     | ALS35220.1     |
|                                   |                        | HIF2 $\alpha$ Sequence ID |                |                |
|                                   |                        | VHL Sequence ID           |                |                |
| <i>Phrynocephalus erythrurus</i>  | Agama                  | HIF1 $\alpha$ Sequence ID | KP696483.1     | ALS35221.1     |
|                                   |                        | HIF2 $\alpha$ Sequence ID | KP696480.1     | ALS35218.1     |
|                                   |                        | VHL Sequence ID           |                |                |
| <i>Pogona vitticeps</i>           | Central bearded dragon | HIF1 $\alpha$ Sequence ID | XM_020813439.1 | XP_020669098.1 |
|                                   |                        | HIF2 $\alpha$ Sequence ID | XM_020796898.1 | XP_020652557.1 |
|                                   |                        | VHL Sequence ID           | XM_020791430.1 | XP_020647089.1 |
| <i>Ophiophagus hannah</i>         | King cobra             | HIF1 $\alpha$ Sequence ID | AZIM01002394.1 | ETE64108.1     |
|                                   |                        | HIF2 $\alpha$ Sequence ID |                |                |
|                                   |                        | VHL Sequence ID           | AZIM01000385.1 | ETE71348.1     |
| <i>Xenopus laevis</i>             |                        | HIF1 $\alpha$ Sequence ID | DQ529235.1     | ABF71072.1     |

|                                      |                           |                           |                       |                      |
|--------------------------------------|---------------------------|---------------------------|-----------------------|----------------------|
|                                      | African clawed frog       | HIF2 $\alpha$ Sequence ID | NM_001092249.1        | NP_001085718.1       |
|                                      |                           | VHL Sequence ID           | KC700047.1            | AHE80969.1           |
| <i>Xenopus tropicalis</i>            | Western clawed frog       | HIF1 $\alpha$ Sequence ID |                       |                      |
|                                      |                           | HIF2 $\alpha$ Sequence ID | NM_001005647.1        | NP_001005647.1       |
|                                      |                           | VHL Sequence ID           |                       |                      |
| <i>Rana temporaria</i>               | Common frog               | HIF1 $\alpha$ Sequence ID | EU262663.1            | ABY86629.1           |
|                                      |                           | HIF2 $\alpha$ Sequence ID |                       |                      |
|                                      |                           | VHL Sequence ID           |                       |                      |
| <i>Protopterus annectens</i>         | West African lungfish     | HIF1 $\alpha$ Sequence ID | JQ031040.1            | AFU07559.1           |
|                                      |                           | HIF2 $\alpha$ Sequence ID |                       |                      |
|                                      |                           | VHL Sequence ID           |                       |                      |
| <i>Latimeria chalumnae</i>           | Coelacanth                | HIF1 $\alpha$ Sequence ID | XM_005986412.2        | XP_005986474.1       |
|                                      |                           | HIF2 $\alpha$ Sequence ID | XM_006007491.2        | XP_006007553.1       |
|                                      |                           | VHL Sequence ID           | XM_005987945.2        | XP_005988007.1       |
| <i>Danio rerio</i>                   | Zebrafish                 | HIF1 $\alpha$ Sequence ID | NM_001310042.1        | NP_001296971.1       |
|                                      |                           | HIF2 $\alpha$ Sequence ID | NM_001039806.2        | NP_001034895.2       |
|                                      |                           | VHL Sequence ID           | NM_001080684.1        | NP_001074153.1       |
| <i>Oncorhynchus tshawytscha</i>      | Chinook Salmon            | HIF1 $\alpha$ Sequence ID | XM_024437278.1        | XP_024293046.1       |
|                                      |                           | HIF2 $\alpha$ Sequence ID | XM_024388216.1        | XP_024243984.1       |
|                                      |                           | VHL Sequence ID           | XM_024407786.1        | XP_024263554.1       |
| <i>Cyprinus carpio</i>               | Common carp               | HIF1 $\alpha$ Sequence ID | EU144225.1            | ABV59209.1           |
|                                      |                           | HIF2 $\alpha$ Sequence ID | XM_019113102.1        | XP_018968647.1       |
|                                      |                           | VHL Sequence ID           | XM_019077133.1        | XP_018932678.1       |
| <i>Acipenser gueldenstaedtii</i>     | Russian sturgeon          | HIF1 $\alpha$ Sequence ID | EF100701.1            | ABO26712.1           |
|                                      |                           | HIF2 $\alpha$ Sequence ID |                       |                      |
|                                      |                           | VHL Sequence ID           |                       |                      |
| <i>Mustelus canis</i>                | Smooth dogfish            | HIF1 $\alpha$ Sequence ID | EU262662.1            | ABY86628.1           |
|                                      |                           | HIF2 $\alpha$ Sequence ID |                       |                      |
|                                      |                           | VHL Sequence ID           |                       |                      |
| <i>Hemiscyllium ocellatum</i>        | Epaulette shark           | HIF1 $\alpha$ Sequence ID | EU262661.1            | ABY86627.1           |
|                                      |                           | HIF2 $\alpha$ Sequence ID | GQ152300.1            | ADD59897.1           |
|                                      |                           | VHL Sequence ID           |                       |                      |
| <i>Rhincodon typus</i>               | Whale shark               | HIF1 $\alpha$ Sequence ID | XM_020515091.1        | XP_020370680.1       |
|                                      |                           | HIF2 $\alpha$ Sequence ID | XM_020510059.1        | XP_020365648.1       |
|                                      |                           | VHL Sequence ID           | XM_020532548.1        | XP_020388137.1       |
| <i>Callorhynchus milii</i>           | Elephant shark            | HIF1 $\alpha$ Sequence ID | XM_007903838.1        | XP_007902029.1       |
|                                      |                           | HIF2 $\alpha$ Sequence ID | XM_007896863.1        | XP_007895054.1       |
|                                      |                           | VHL Sequence ID           | XM_007904937.1        | XP_007903128.1       |
| <i>Petromyzon marinus</i>            | Lamprey                   | HIF1 $\alpha$ Sequence ID | ENSPMAG00000000126    | ENSPMAT00000000148.1 |
|                                      |                           | HIF2 $\alpha$ Sequence ID | ENSPMAG000000009272   | ENSPMAT00000010244.1 |
|                                      |                           | VHL Sequence ID           | ENSPMAG000000009828.1 | ENSPMAP00000010802.1 |
| <i>Saccoglossus kowalevskii</i>      | Acorn worm                | HIF1 $\alpha$ Sequence ID | XM_002733741.3        | XP_002733787.2       |
|                                      |                           | HIF2 $\alpha$ Sequence ID |                       |                      |
|                                      |                           | VHL Sequence ID           | XM_002733273.2        | XP_002733319.1       |
| <i>Strongylocentrotus purpuratus</i> | Pacific purple sea urchin | HIF1 $\alpha$ Sequence ID | KX786251.1            | ASL69982.1           |
|                                      |                           | VHL Sequence ID           | KX786255.1            | ASL69986.1           |
| <i>Acanthaster planci</i>            | Crown-of-thorns starfish  | HIF1 $\alpha$ Sequence ID | XM_022242264.1        | XP_022097956.1       |
|                                      |                           | VHL Sequence ID           | XM_022236676.1        | XP_022092368.1       |
| <i>Haliotis diversicolor</i>         | Sea snail                 | HIF1 $\alpha$ Sequence ID | KC149963.1            | AGE97172.1           |
|                                      |                           | VHL Sequence ID           |                       |                      |
| <i>Crassostrea gigas</i>             | Pacific oyster            | HIF1 $\alpha$ Sequence ID | NM_001305337.1        | NP_001292266.1       |
|                                      |                           | VHL Sequence ID           | XM_011431794.2        | XP_011430096.1       |

|                                |                          |                           |                |                |
|--------------------------------|--------------------------|---------------------------|----------------|----------------|
| <i>Crassostrea virginica</i>   | Eastern oyster           | HIF1 $\alpha$ Sequence ID | HM441076.1     | AED87588.1     |
|                                |                          | VHL Sequence ID           | XM_022484237.1 | XP_022339945.1 |
| <i>Mizuhopecten yessoensis</i> | Yesso scallop            | HIF1 $\alpha$ Sequence ID | XM_021497943.1 | XP_021353618.1 |
|                                |                          | VHL Sequence ID           | XM_021485147.1 | XP_021340822.1 |
| <i>Lingula anatina</i>         | Lamp shell               | HIF1 $\alpha$ Sequence ID | XM_013531134.2 | XP_013386588.1 |
|                                |                          | VHL Sequence ID           | XM_013557922.1 | XP_013413376.1 |
| <i>Orussus abietinus</i>       | Parasitic wood wasp      | HIF1 $\alpha$ Sequence ID | XM_012420115.2 | XP_012275538.1 |
|                                |                          | VHL Sequence ID           | XM_012420856.1 | XP_012276279.1 |
| <i>Nasonia vitripennis</i>     | Jewel wasp               | HIF1 $\alpha$ Sequence ID |                |                |
|                                |                          | VHL Sequence ID           | XM_016983273.1 | XP_016838762.1 |
| <i>Bombus terrestris</i>       | Buff-tailed bumblebee    | HIF1 $\alpha$ Sequence ID |                |                |
|                                |                          | VHL Sequence ID           | XM_003399514.3 | XP_003399562.1 |
| <i>Trachymyrmex cornetzi</i>   | Ant                      | HIF1 $\alpha$ Sequence ID | KQ978957.1     | KYN27213.1     |
|                                |                          | VHL Sequence ID           | XM_018510151.1 | XP_018365653.1 |
| <i>Nilaparvata lugens</i>      | Brown planthopper        | HIF1 $\alpha$ Sequence ID | XM_022331880.1 | XP_022187572.1 |
|                                |                          | VHL Sequence ID           |                |                |
| <i>Onthophagus taurus</i>      | Dung beetle              | HIF1 $\alpha$ Sequence ID | XM_023055980.1 | XP_022911748.1 |
|                                |                          | VHL Sequence ID           |                |                |
| <i>Ixodes scapularis</i>       | Black-legged tick        | HIF1 $\alpha$ Sequence ID |                |                |
|                                |                          | VHL Sequence ID           | XM_002407200.1 | XP_002407244.1 |
| <i>Limulus polyphemus</i>      | Atlantic horseshoe crab  | HIF1 $\alpha$ Sequence ID | XM_013921719.2 | XP_013777173.1 |
|                                |                          | VHL Sequence ID           |                |                |
| <i>Daphnia magna</i>           | Waterflea                | HIF1 $\alpha$ Sequence ID | AB425958.1     | BAG69568.1     |
|                                |                          | VHL Sequence ID           | LRGB01000915.1 | KZS15206.1     |
| <i>Daphnia pulex</i>           | Waterflea                | HIF1 $\alpha$ Sequence ID | GL732533.1     | EFX84860.1     |
|                                |                          | VHL Sequence ID           | GL732523.1     | EFX89933.1     |
| <i>Caenorhabditis elegans</i>  | Roundworm                | HIF1 $\alpha$ Sequence ID | NM_075607.5    | NP_508008.4    |
|                                |                          | VHL Sequence ID           | NM_077488.3    | NP_509889.1    |
| <i>Ascaris suum</i>            | Pig roundworm            | HIF1 $\alpha$ Sequence ID | AB520828.1     | BAJ17131.1     |
|                                |                          | VHL Sequence ID           |                |                |
| <i>Pristionchus pacificus</i>  | Roundworm                | HIF1 $\alpha$ Sequence ID | ABKE03000053.1 | PDM75007.1     |
|                                |                          | VHL Sequence ID           |                |                |
| <i>Exaiptasia pallida</i>      | sea anemone              | HIF1 $\alpha$ Sequence ID | LJWW01000106.1 | KXJ20783.1     |
|                                |                          | VHL Sequence ID           | XM_021061147.1 | XP_020916806.1 |
| <i>Nematostella vectensis</i>  | Starlet sea anemone      | HIF1 $\alpha$ Sequence ID | KJ411881.1     | AII22158.1     |
|                                |                          | VHL Sequence ID           |                |                |
| <i>Orbicella faveolata</i>     | mountainous star coral   | HIF1 $\alpha$ Sequence ID | XM_020774709.1 | XP_020630368.1 |
|                                |                          | VHL Sequence ID           | XM_020746540.1 | XP_020602199.1 |
| <i>Stylophora pistillata</i>   | Smooth cauliflower coral | HIF1 $\alpha$ Sequence ID | XM_022941810.1 | XP_022797545.1 |
|                                |                          | VHL Sequence ID           | XM_022948633.1 | XP_022804368.1 |
| <i>Acropora digitifera</i>     | Coral                    | HIF1 $\alpha$ Sequence ID |                |                |
|                                |                          | VHL Sequence ID           | XM_015898670.1 | XP_015754156.1 |
| <i>Trichoplax adhaerens</i>    | Tablet animal            | HIF1 $\alpha$ Sequence ID | JQ844128.1     | AFM37575.1     |
|                                |                          | VHL Sequence ID           |                | Triad1P7508    |
